# Supplementary material for: Aluminium exposure disrupts elemental homeostasis in Caenorhabditis elegans
Source: Royal Society of Chemistry journal article supplement (doi:10.1039/c2mt00146b), 2012-01-01

**Supplemental Table 1: Developmental delay for Al agar plate toxicity.** Comparison of the average number of worms to reach adulthood for all conditions tested (percentage adults),  $\pm$  SEM. P values are shown in the table, ns = not significant ( $P < 0.05$ ).

| Al Concentration (mM) | Percentage adult (Ave) | SEM  | n | P Value |
|-----------------------|------------------------|------|---|---------|
| 0                     | 100.0                  | 0.0  | 6 | -       |
| 5                     | 100.0                  | 0.0  | 6 | -       |
| 6                     | 88.3                   | 8.3  | 6 | 0.220   |
| 7                     | 83.3                   | 16.7 | 6 | 0.795   |
| 8                     | 0.0                    | 0.0  | 6 | 0.004   |

**Supplemental Table 2: ICP sample dry weights.** The table shows the average dry weight (mg) for pellets of dried worms, along with SEM and n, for each exposure condition for the P<sub>0</sub>, F<sub>1</sub> and F<sub>2</sub> generations.

|                | Exposure  | Ave Weight (mg) | SEM | n |
|----------------|-----------|-----------------|-----|---|
| P <sub>0</sub> | Control   | 16.9            | 3.0 | 8 |
|                | 0.3 mM Al | 15.7            | 5.2 | 4 |
|                | 1.9 mM Al | 12.5            | 4.0 | 4 |
|                | 4.8 mM Al | 10.1            | 1.3 | 6 |
| F <sub>1</sub> | Control   | 22.7            | 2.4 | 7 |
|                | Al        | 39.8            | 5.3 | 6 |
| F <sub>2</sub> | Control   | 16.4            | 2.4 | 4 |
|                | Al        | 23.7            | 1.6 | 5 |

**Supplemental Table 3: Wavelengths and detection limits for elemental analysis.** The table shows each element analyzed, along with the wavelength used for analysis of each element, and the minimum detection limit (min DL) possible for each element.

| Symbol | Element     | Wavelength (nm) | min DL ( $\mu\text{g/ml}$ ) |
|--------|-------------|-----------------|-----------------------------|
| Al     | aluminium   | 237.312         | 0.050                       |
| B      | boron       | 249.772         | 0.005                       |
| Ba     | barium      | 233.527         | 0.005                       |
| Ca     | calcium     | 373.690         | 0.050                       |
| Cd     | cadmium     | 214.439         | 0.005                       |
| Co     | cobalt      | 230.786         | 0.050                       |
| Cr     | chromium    | 267.716         | 0.005                       |
| Cu     | copper      | 327.395         | 0.005                       |
| Fe     | iron        | 238.204         | 0.005                       |
| K      | potassium   | 766.491         | 0.050                       |
| Mg     | magnesium   | 280.270         | 0.050                       |
| Mn     | manganese   | 259.372         | 0.005                       |
| Na     | sodium      | 588.821         | 0.500                       |
| Ni     | nickel      | 230.299         | 0.050                       |
| P      | phosphorous | 213.618         | 0.500                       |
| S      | sulfur      | 181.972         | 0.500                       |
| Sc     | scandium    | 361.383         | 0.050                       |
| Se     | selenium    | 196.026         | 0.050                       |
| Si     | silicon     | 251.611         | 0.005                       |
| Sn     | tin         | 189.927         | 0.010                       |
| Sr     | strontium   | 407.771         | 0.005                       |
| Ti     | titanium    | 334.941         | 0.050                       |
| Y      | yttrium     | 371.029         | 0.050                       |
| Zn     | zinc        | 213.857         | 0.005                       |
| Zr     | zirconium   | 343.823         | 0.050                       |

**Supplemental Table 4: Bacterial and worm elemental profiles are significantly different.** The table shows total abundance of elements for control and Al exposed bacteria and worms as  $\mu\text{g}$  element / mg of dried worm pellet ( $\pm$  SEM), and percentage change from control for both worm and bacteria ( $\pm$  SEM); n indicates biological replicates. The P values are given for both bacteria and worms when comparing the control and Al exposed samples, and for a comparison of the percentage change from control for bacteria compared to worm samples; \* indicates significance of  $P < 0.05$  from Student's T-test. When comparing the elements where significant change occurs (Al exposed compared to control) for either bacteria or worm samples, these values are all significantly different ( $P < 0.05$ ) via Student's T-test, with the exception of B and Na ( $P > 0.05$ ).

| Element | Bacteria                        |        |   |                                 |        |    |                  |         |                       |                                 | Worms   |         |                                 |          |        |                  |                  |     |                       |          | P Value (bacteria v worms) % change |   |
|---------|---------------------------------|--------|---|---------------------------------|--------|----|------------------|---------|-----------------------|---------------------------------|---------|---------|---------------------------------|----------|--------|------------------|------------------|-----|-----------------------|----------|-------------------------------------|---|
|         | C                               |        |   | Al                              |        |    | P Value (Al v C) |         | % change from Control |                                 | C       |         |                                 | Al       |        |                  | P Value (Al v C) |     | % change from Control |          |                                     |   |
|         | Ave ( $\mu\text{g}/\text{mg}$ ) | SEM    | n | Ave ( $\mu\text{g}/\text{mg}$ ) | SEM    | n  | P Value (Al v C) | Ave (%) | SEM                   | Ave ( $\mu\text{g}/\text{mg}$ ) | SEM     | n       | Ave ( $\mu\text{g}/\text{mg}$ ) | SEM      | n      | P Value (Al v C) | Ave (%)          | SEM |                       |          |                                     |   |
|         |                                 |        |   |                                 |        |    |                  |         |                       |                                 |         |         |                                 |          |        |                  |                  |     |                       |          |                                     |   |
| Al      | 0.0316                          | 0.0025 | 9 | 13.8647                         | 0.5853 | 10 | 0.0000           | *       | 43755.0627            | 1851.2492                       | 0.0306  | 0.0088  | 6                               | 5.1356   | 0.2939 | 4                | 0.0000           | *   | 16663.6020            | 783.4289 | 0.0000                              | * |
| B       | 0.0035                          | 0.0001 | 9 | 0.0055                          | 0.0001 | 10 | 0.0000           | *       | 57.8458               | 2.1747                          | 0.0156  | 0.0021  | 8                               | 0.0228   | 0.0019 | 4                | 0.0167           | *   | 46.3133               | 9.9108   | 0.3029                              |   |
| Ba      | 0.0078                          | 0.0006 | 9 | 0.0062                          | 0.0006 | 10 | 0.0948           |         | -20.0203              | 7.8320                          | 0.0059  | 0.0019  | 6                               | 0.0471   | 0.0113 | 4                | 0.0060           | *   | 692.2730              | 155.3110 | 0.0059                              | * |
| Ca      | 0.3755                          | 0.0157 | 9 | 1.3180                          | 0.0204 | 10 | 0.0000           | *       | 250.9648              | 5.4429                          | 6.7276  | 0.4305  | 8                               | 4.2597   | 0.3107 | 4                | 0.0005           | *   | -36.6825              | 3.7704   | 0.0000                              | * |
| Cd      | 0.0005                          | 0.0000 | 8 |                                 |        | 0  |                  |         |                       |                                 | 0.0062  | 0.0008  | 8                               | 0.0034   | 0.0010 | 2                | 0.0242           | *   | -46.0349              | 11.2829  |                                     |   |
| Cr      | 0.0041                          | 0.0003 | 9 | 0.0049                          | 0.0003 | 10 | 0.0909           |         | 19.0576               | 7.8541                          | 0.0053  | 0.0030  | 8                               | 0.0233   | 0.0050 | 4                | 0.0055           | *   | 342.4861              | 77.8260  | 0.0087                              | * |
| Cu      | 0.0078                          | 0.0003 | 9 | 0.0083                          | 0.0002 | 10 | 0.2602           |         | 5.7279                | 2.9712                          | 0.0135  | 0.0032  | 8                               | 0.0602   | 0.0158 | 4                | 0.0141           | *   | 345.3020              | 95.4245  | 0.0162                              | * |
| Fe      | 0.2600                          | 0.0068 | 9 | 0.1655                          | 0.0085 | 10 | 0.0000           | *       | -36.3193              | 3.2648                          | 0.2186  | 0.0653  | 8                               | 0.4241   | 0.0712 | 4                | 0.0368           | *   | 94.0139               | 26.6056  | 0.0043                              | * |
| K       | 10.2941                         | 0.3697 | 9 | 9.9726                          | 0.3465 | 10 | 0.5343           |         | -3.1232               | 3.3664                          | 26.9525 | 2.4043  | 8                               | 31.5816  | 1.4034 | 4                | 0.1134           |     | 17.1751               | 4.2514   | 0.0033                              | * |
| Mg      | 2.4155                          | 0.0906 | 9 | 1.6481                          | 0.0696 | 10 | 0.0000           | *       | -31.7681              | 2.8828                          | 2.6072  | 0.1926  | 8                               | 3.3969   | 0.3952 | 4                | 0.0671           |     | 30.2872               | 12.3779  | 0.0034                              | * |
| Mn      | 0.0114                          | 0.0003 | 9 | 0.0021                          | 0.0001 | 10 | 0.0000           | *       | -81.4736              | 0.9659                          | 0.0177  | 0.0024  | 8                               | 0.0465   | 0.0153 | 4                | 0.0694           |     | 163.3017              | 70.8691  | 0.0182                              | * |
| Na      | 18.4962                         | 0.9691 | 9 | 28.3781                         | 1.2918 | 10 | 0.0000           | *       | 53.4272               | 6.9842                          | 69.5007 | 11.8925 | 8                               | 100.8975 | 8.4030 | 4                | 0.0435           | *   | 45.1747               | 9.8719   | 0.5106                              |   |
| Ni      | 0.0080                          | 0.0005 | 9 | 0.0067                          | 0.0007 | 10 | 0.1465           |         | -15.4831              | 8.3548                          | 0.0291  | 0.0018  | 3                               | 0.0244   | 0.0047 | 4                | 0.3025           |     | -16.1715              | 13.1322  | 0.9657                              |   |
| P       | 24.5106                         | 0.8414 | 9 | 40.4315                         | 1.2547 | 10 | 0.0000           | *       | 64.9550               | 5.1190                          | 55.0049 | 5.3131  | 8                               | 74.5452  | 3.9621 | 4                | 0.0094           | *   | 35.5247               | 5.8814   | 0.0028                              | * |
| S       | 6.1409                          | 0.1993 | 9 | 6.2837                          | 0.1966 | 10 | 0.6166           |         | 2.3253                | 3.2011                          | 5.2047  | 0.2261  | 8                               | 6.0105   | 0.2741 | 4                | 0.0267           | *   | 15.4826               | 4.2993   | 0.0333                              | * |
| Si      | 1.8839                          | 0.1808 | 9 | 1.6442                          | 0.1917 | 10 | 0.3757           |         | -12.7234              | 10.1753                         | 7.1296  | 1.9178  | 8                               | 12.6482  | 2.6877 | 4                | 0.0849           |     | 77.4032               | 30.7800  | 0.0314                              | * |
| Sr      | 0.0020                          | 0.0001 | 9 | 0.0084                          | 0.0002 | 10 | 0.0000           | *       | 324.4617              | 11.1337                         | 0.0114  | 0.0020  | 8                               | 0.0160   | 0.0022 | 4                | 0.1178           |     | 39.8917               | 15.4615  | 0.0000                              | * |

|    |        |        |   |        |        |    |        |   |          |        |        |        |   |        |        |   |        |  |          |        |        |   |  |
|----|--------|--------|---|--------|--------|----|--------|---|----------|--------|--------|--------|---|--------|--------|---|--------|--|----------|--------|--------|---|--|
| Ti | 0.0055 | 0.0004 | 9 | 0.0050 | 0.0005 | 9  | 0.4773 |   | -8.3440  | 8.2685 |        |        |   |        |        |   |        |  |          |        |        |   |  |
| Zn | 0.0437 | 0.0008 | 9 | 0.0129 | 0.0007 | 10 | 0.0000 | * | -70.4071 | 1.5344 | 0.0575 | 0.0029 | 8 | 0.0483 | 0.0051 | 4 | 0.1033 |  | -15.9441 | 7.2806 | 0.0005 | * |  |

Supplementary Figure 1.

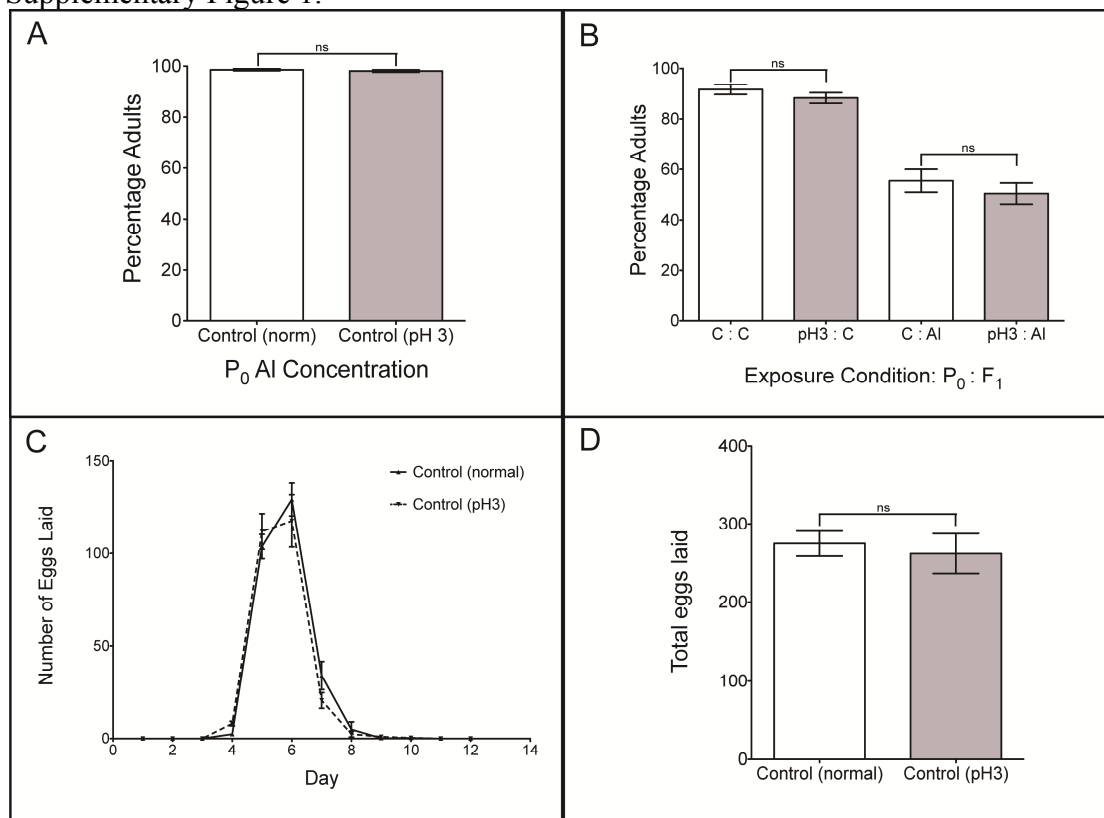

Supplementary Figure 2

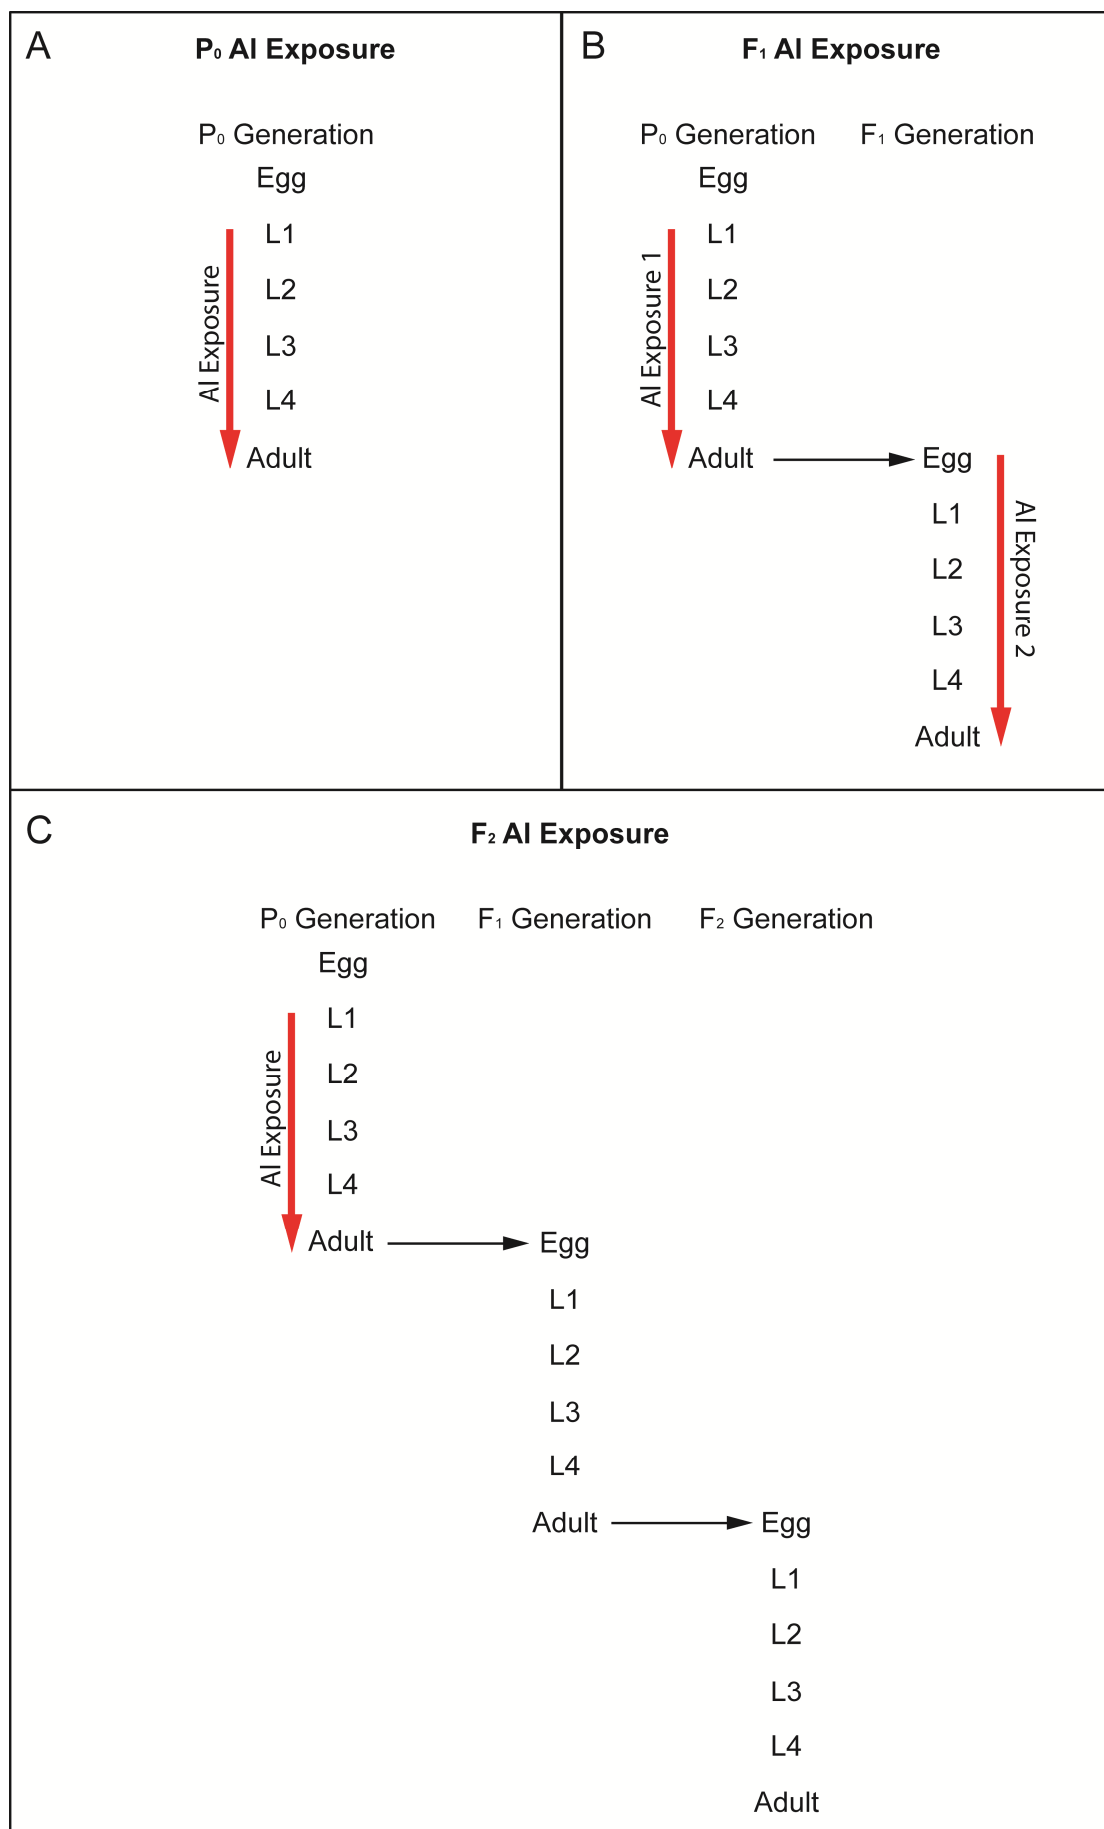

Supplementary Figure 3

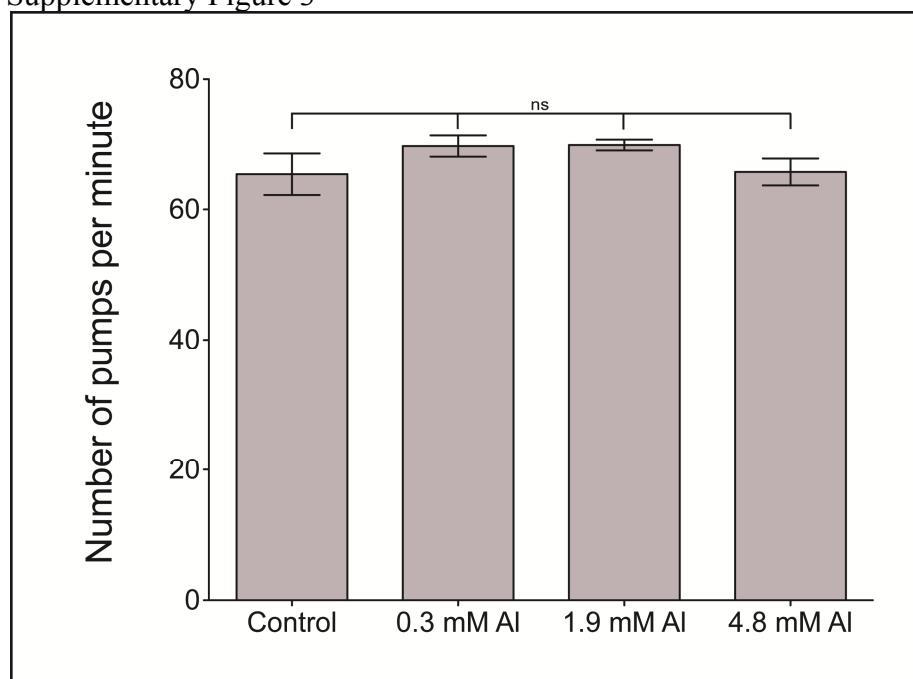

Supplement: c2mt00146b.pdf [file c2mt00146b.pdf]
